# Supplementary material
Source: ML conference proceedings conference paper supplement (https://proceedings.neurips.cc/paper_files/paper/2024/hash/c4e3b55ed4ac9ba52d7df11f8bddbbf4-Abstract.html)
Supplement: Supplementary file 2 [file c4e3b55ed4ac9ba52d7df11f8bddbbf4-Supplemental-Datasets_and_Benchmarks_Track.pdf]

---

# Supplementary Materials for Learning Superconductivity from Ordered and Disordered Material Structures

---

Anonymous Author(s)

|    |                                                     |          |
|----|-----------------------------------------------------|----------|
| 1  | <b>Contents</b>                                     |          |
| 2  | <b>1 SuperCon3D data details</b>                    | <b>3</b> |
| 3  | <b>2 Methods</b>                                    | <b>4</b> |
| 4  | 2.1 Interstitial disorder . . . . .                 | 4        |
| 5  | 2.2 Gate layer . . . . .                            | 4        |
| 6  | 2.3 The denoising method of DiffCSP . . . . .       | 4        |
| 7  | <b>3 Hyper-parameters and training details</b>      | <b>5</b> |
| 8  | 3.1 Property predicting models . . . . .            | 5        |
| 9  | 3.1.1 SchNet. . . . .                               | 5        |
| 10 | 3.1.2 CGCNN. . . . .                                | 5        |
| 11 | 3.1.3 DimNet++. . . . .                             | 5        |
| 12 | 3.1.4 SphereNet. . . . .                            | 6        |
| 13 | 3.1.5 ALIGNN. . . . .                               | 6        |
| 14 | 3.1.6 Matformer. . . . .                            | 6        |
| 15 | 3.1.7 MEGNet. . . . .                               | 6        |
| 16 | 3.1.8 SODNet . . . . .                              | 6        |
| 17 | 3.2 Generative models . . . . .                     | 7        |
| 18 | 3.2.1 CDVAE. . . . .                                | 8        |
| 19 | 3.2.2 SyMat. . . . .                                | 8        |
| 20 | 3.2.3 DiffCSP. . . . .                              | 8        |
| 21 | 3.2.4 DiffCSP-SC. . . . .                           | 8        |
| 22 | 3.3 Pre-training dataset . . . . .                  | 8        |
| 23 | <b>4 Potential superconductors</b>                  | <b>8</b> |
| 24 | 4.1 Real-world superconductors validation . . . . . | 8        |

|    |          |                                                           |           |
|----|----------|-----------------------------------------------------------|-----------|
| 25 | 4.2      | Screening based method . . . . .                          | 9         |
| 26 | 4.3      | Interpretability on SODNet . . . . .                      | 9         |
| 27 | 4.4      | Generative superconducting candidates . . . . .           | 11        |
| 28 | 4.5      | DFT calculations . . . . .                                | 11        |
| 29 | <b>5</b> | <b>Pipeline for designing real-world superconductors.</b> | <b>13</b> |
| 30 | <b>6</b> | <b>Limitations</b>                                        | <b>14</b> |
| 31 | <b>7</b> | <b>Code</b>                                               | <b>14</b> |

32 The appendix is organized as follows: Section 1 details the collection method and distribution of the  
 33 SuperCon3D dataset. Section 2 presents more details of disordered graph and models. Section 3  
 34 elaborates on the implementation specifics of both property prediction and generative models. The  
 35 identification of potential superconductors and their corresponding DFT computational outcomes  
 36 are presented in Section 4. A systematic approach for the design of practical superconductors is  
 37 expounded in Section 5. We present the limitation of our data and models in Section 6. Section 7  
 38 provides the repository link for the associated coding resources.

### 39 1 SuperCon3D data details

40 We extracted approximately 33,000 superconductors, including their chemical formulas and critical  
 41 temperatures, from the SuperCon database<sup>1</sup>. After eliminating duplicates and non-superconductors,  
 42 we retained 11,949 superconducting materials. Over 200,000 ordered and disordered crystal structures  
 43 were collected from the ICSD database. We then matched the 11,949 SuperCon entries with 208,425  
 44 ICSD entries based on chemical composition, space group and lattice parameter. Specifically, we first  
 45 performed an initial matching based on chemical composition, which may result in one-to-one or  
 46 one-to-many matches. We then further refined the matches using additional information provided  
 47 in the literature, such as space groups and lattice constants. Additionally,  $T_c$  values and structural  
 48 data for hydrogen-enriched superconductors were obtained from literature sources. Ultimately, we  
 49 compiled 1,578 superconductors with both  $T_c$  and crystal structure information.

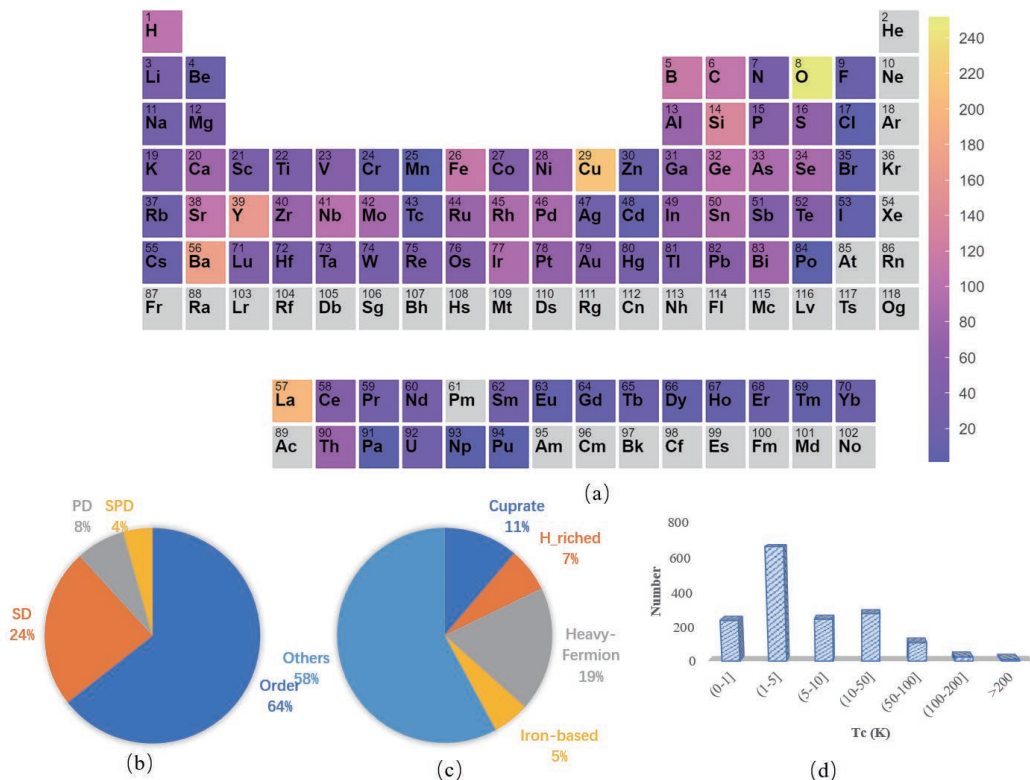

Figure 4: The data distribution of SuperCon3D dataset. (a). The probability of crystals containing a given element in the dataset. (b). The distribution of ordered and disordered superconductors. (c). The distribution of superconducting types. (d). The distribution of  $T_c$  values.

50 We plot the data distribution of SuperCon3D dataset in Fig. 4. In dataset, there are 83 different  
 51 elements, which encompass most of elemental types found in the periodic table. The most frequent

<sup>1</sup><https://github.com/vstanev1/Supercon>

52 elements are O, Cu, La, Ba, Y as shown in Fig. 4a. Fig. 4b depicts the order and disorder distribution.  
 53 We classify superconducting materials according to cuprate, H riched, heavy fermion, iron based,  
 54 and others, and distribute the types in Fig. 4c. The distribution of the Tc values of superconducting  
 55 materials is shown in Fig. 4d. The SuperCon3D dataset can be obtained from the source code package,  
 56 and the access address is provide in Sec. 7.

## 57 2 Methods

### 58 2.1 Interstitial disorder

59 **Interstitial disorder (ID).** ID refers to the presence of atoms occupying interstitial sites within a  
 60 crystal lattice, which are not part of the regular lattice positions. These interstitial atoms introduce  
 61 additional disorder into the structure. The total occupancy, including both regular lattice sites and  
 62 interstitial sites, can be expressed as:

$$\mathbf{w}_{i,1} + \mathbf{w}_{i,2} + \cdots + \mathbf{w}_{i,m_i} + \mathbf{w}_{i,interstitial} = 1 + \Delta \quad (1)$$

63 where  $\mathbf{w}_{i,m_i}$  represents the occupancy weight of  $m_i$  at site  $i$ ,  $\mathbf{w}_{i,interstitial}$  represents the occupancy  
 64 weight of interstitial atoms at site  $i$ ,  $\Delta$  is the excess occupancy due to interstitial atoms, with  $\Delta > 0$   
 65 indicating the presence of ID. In this case, our disordered graph encoding method remains effective.

66 ID mixed with substitutional disorder (SD) and positional disorder (PD), would result in more new  
 67 types. However, given the lack of observation of ID in the SuperCon3D dataset, we will not elaborate  
 68 further on it.

### 69 2.2 Gate layer

70 We employ the gate activation mechanism Weiler et al. [2018] for the equivariant activation function.  
 71 Standard activation functions are applied to type-0 vectors. For higher order vectors ( $L > 0$ ), we achieve  
 72 equivariance by multiplying them with non-linearly transformed type-0 vectors. Specifically, for an  
 73 input  $x$  comprising non-scalar  $C_L$  type-L vectors (where  $0 < L \leq L_{\max}$ ) and  $(C_0 + P_L \sum_{L=1}^{L_{\max}} C_L)$   
 74 type-0 vectors, we apply SiLU Elfving et al. [2018] to the first  $C_0$  type-0 vectors and a sigmoid  
 75 function to the remaining  $P_L \sum_{L=1}^{L_{\max}} C_L$  type-0 vectors. This process generates non-linear weights,  
 76 which are then used to scale each type-L vector. After gate activation, the number of channels for  
 77 type-0 vectors is reduced to  $C_0$ .

### 78 2.3 The denoising method of DiffCSP

79 We introduce the denoising model  $\phi(\mathbf{L}, \mathbf{F}, \mathbf{A}, t)$  as part of the original DiffCSP model, which is  
 80 related to the *Transformer-based Architecture* section in the main text.

81 Node representations in the  $s$ -th layer,  $\mathbf{H}^{(s)} = [\mathbf{h}_1^{(s)}, \cdots, \mathbf{h}_N^{(s)}]$ , are initialized as  $\mathbf{h}_i^{(0)} =$   
 82  $\rho(f_{\text{atom}}(\mathbf{a}_i), f_{\text{pos}}(t))$ , combining atomic embeddings  $f_{\text{atom}}$  and sinusoidal positional encoding  $f_{\text{pos}}$  Ho  
 83 et al. [2020], Vaswani et al. [2017], processed by MLP  $\rho$ .

84 Incorporating EGNN Satorras et al. [2021], the message-passing in layer  $s$  is:

$$\mathbf{m}_{ij}^{(s)} = \varphi_m(\mathbf{h}_i^{(s-1)}, \mathbf{h}_j^{(s-1)}, \mathbf{L}^\top \mathbf{L}, \psi_{\text{FT}}(\mathbf{f}_j - \mathbf{f}_i)), \quad (2)$$

$$\mathbf{m}_i^{(s)} = \sum_{j=1}^N \mathbf{m}_{ij}^{(s)}, \quad (3)$$

$$\mathbf{h}_i^{(s)} = \mathbf{h}_i^{(s-1)} + \varphi_h(\mathbf{h}_i^{(s-1)}, \mathbf{m}_i^{(s)}). \quad (4)$$

85 Here,  $\varphi_m$  and  $\varphi_h$  are MLPs.  $\psi_{\text{FT}}$  executes Fourier Transformation on relative fractional coordinates,  
 86 ensuring periodic translation invariance.

87 Following  $S$  message-passing layers, lattice noise  $\hat{\epsilon}_L$  is computed as follows:

$$\hat{\epsilon}_L = \mathbf{L}\varphi_L\left(\frac{1}{N}\sum_i 1^N \mathbf{h}_i^{(S)}\right), \quad (5)$$

88 with  $\varphi_L$  shaping output as  $3 \times 3$ . For fractional coordinate score  $\hat{\epsilon}_F$ , we have:

$$\hat{\epsilon}_F[:, i] = \varphi_F(\mathbf{h}_i^{(S)}), \quad (6)$$

89 where  $\hat{\epsilon}_F[:, i]$  is the  $i$ -th column, and  $\varphi_F$  operates on the final layer’s output.

90 The inner product  $\mathbf{L}^\top \mathbf{L}$  in Eq.(2) ensures O(3)-invariance, as  $(\mathbf{Q}\mathbf{L})^\top (\mathbf{Q}\mathbf{L}) = \mathbf{L}^\top \mathbf{L}$  for any orthog-  
91 onal  $\mathbf{Q} \in \mathbb{R}^{3 \times 3}$ . This guarantees the O(3)-invariance of  $\varphi_L$  in Eq.(6), and  $\mathbf{L}$  left-multiplied with  $\varphi_L$   
92 ensures O(3)-equivariance of  $\hat{\epsilon}_L$ . Thus,  $\phi(\mathbf{L}, \mathbf{F}, \mathbf{A}, t)$  satisfies the proposed properties. More details  
93 are described in Jiao et al. [2023].

### 94 3 Hyper-parameters and training details

95 In this section, we provide the training details of property predicting models and generative models.

#### 96 3.1 Property predicting models

97 We employ the codebase from SchNet Schütt et al. [2018]<sup>2</sup>, CGCNN Xie and Grossman [2018]<sup>3</sup>,  
98 DimNet++ Gasteiger et al. [2020]<sup>4</sup>, SphereNet Liu et al. [2022]<sup>5</sup>,ALIGNN Choudhary and DeCost  
99 [2021]<sup>6</sup>, Matformer Yan et al. [2022]<sup>7</sup> and MEGNet Chen et al. [2019]<sup>8</sup> for baseline implementations.  
100 All models are conducted 10-fold experiments based data splitted method of 8:1:1. The training details  
101 of each model are as follows:

##### 102 3.1.1 SchNet.

103 Employing the SchNet framework, our method integrates six 64-dimensional message passing layers.  
104 SchNet was trained over 500 epochs, using a 5e-4 learning rate and 64 batch size. We optimized  
105 using Adam with 1e-5 weight decay, and a one-cycle learning rate scheduler. Atomic radii were  
106 determined by the 12th smallest distance between an atom and its neighbors.

##### 107 3.1.2 CGCNN.

108 A batch size of 64 is employed, and the model consists of three layers of CGCNN message passing  
109 layer with 128 hidden dimensions. The training process utilizes the Adam optimizer. Initially, a  
110 learning rate of 1e-3 is set for the 200 epochs. During the training, a radius cutoff of 8.0 is applied to  
111 all crystals, and the 32 nearest neighbors are selected.

##### 112 3.1.3 DimNet++.

113 In our approach, we apply a radius cutoff of 8.0 to all crystals and select the 12 nearest neighbors.  
114 To represent each node, we utilize Gaussian radial basis function (RBF) kernels. This results in a  
115 64-dimensional embedding for each node. To optimize the model, we employ the Adam optimizer  
116 with a weight decay of 1e-6. The model is trained for 500 epochs using a batch size of 128.

<sup>2</sup><https://github.com/atomistic-machine-learning/SchNet>

<sup>3</sup><https://github.com/txie-93/cgcnn>

<sup>4</sup><https://github.com/gasteigerjo/dimenet>

<sup>5</sup><https://github.com/divelab/DIG>

<sup>6</sup><https://github.com/usnistgov/alignn>

<sup>7</sup><https://github.com/YKQ98/Matformer>

<sup>8</sup><https://github.com/materialsvirtuallab/megnet>

117 **3.1.4 SphereNet.**

118 In our method, we utilize multi-graph representations of materials as inputs to SphereNet models.  
119 The input embedding size is set to 256, and the output embedding size is set to 64 for both the 8 LB2  
120 and LB blocks. A cutoff distance of 6 is used. For each model, we initially perform a warm-up on  
121 the learning rate, starting at 1e-3. Subsequently, two learning rate strategies—ReduceLRonPlateau  
122 and StepLR—are employed for training. In the StepLR strategy, the learning rate is decayed by a  
123 specified ratio every fixed number of epochs, known as the step size. The batch size is set to 32, and  
124 training is conducted for 300 epochs.

125 **3.1.5 ALIGNN.**

126 ALIGNN is trained for 150 epochs with a learning rate of 5e-4 and a batch size of 64. The model  
127 architecture follows the original paper, consisting of four GCN layers and four ALIGNN layers. The  
128 atom feature dimension is set to 92, and the edge feature dimension is set to 80. The training process  
129 utilize the Adam optimizer with a weight decay of 1e-5. Additionally, a one-cycle learning rate  
130 scheduler is employed. For all crystals, a radius cutoff of 8.0 is applied, and the nearest 12 neighbors  
131 are selected.

132 **3.1.6 Matformer.**

133 In constructing the crystal graph, we follow a specific procedure. The radius for the neighborhood  
134 of a given atom is determined by the 12-th smallest distance between that atom and its neighboring  
135 atoms. All atoms within this radius are considered part of the neighborhood for the given atom. Each  
136 node is then represented by mapping its atomic number to a 92-dimensional embedding using the  
137 CGCNN atomic embedding. This embedding is further transformed into a 128-dimensional vector  
138 through a linear transformation. Similarly, for each edge, we utilize a 128-dimensional embedding  
139 mapping of the Euclidean distance. This mapping is achieved by employing 128 radial basis function  
140 (RBF) kernels with centers ranging from 0.0 to 8.0. During the training process, we employ the  
141 Adam optimizer with a weight decay of 1e-5. Additionally, a one-cycle learning rate scheduler is  
142 utilized. A batch size of 64 is employed and trained for 150 epochs.

143 **3.1.7 MEGNet.**

144 To construct the crystal graph, we employ three layers of the MEGNET message passing with with  
145 64,32,16 hidden units, and utilize the Set2Set readout function. Following the configuration described  
146 in the original paper, MEGNET is trained for 200 epochs using a batch size of 64 and a learning rate  
147 of 1e-3. The Adam optimizer with a weight decay of 1e-5 is used for optimization, and a one-cycle  
148 learning rate scheduler is implemented. A radius of 8.0 is set for all crystals.

Table 7: Hyper-parameters for SODNet.

| Hyper-parameters             | Value or description                      |
|------------------------------|-------------------------------------------|
| Batch size                   | 32, 64, 128                               |
| Number of epochs             | 150, 300                                  |
| Number of attention heads    | 4, 8                                      |
| Dropout rate                 | 0.0, 0.1, 0.2                             |
| Cutoff radius ()             | 8, 12, 16                                 |
| Number of radial bases       | 128                                       |
| Number of transformer blocks | 6                                         |
| Weigh decay                  | $0.5 \times 10^{-3}$ , $1 \times 10^{-3}$ |

149 **3.1.8 SODNet**

150 During training, we use a batch size of 64 and trained the model for 150 epochs. A radius of 8.0  
151 is applied to define the neighborhood of each crystal. We utilize 128 basis functions to capture the

Table 8: Recently discovered superconductors (not included in the training data).

| No. | Material                                                               | Type       | $T_c^{exp}$ (K)         |
|-----|------------------------------------------------------------------------|------------|-------------------------|
| 1   | CaH <sub>6</sub> @172 GPa                                              | Order      | 215 Ma et al. [2022]    |
| 2   | Ti @248 GPa                                                            | Order      | 26 Zhang et al. [2022]  |
| 3   | CsV <sub>3</sub> Sb <sub>5</sub>                                       | Order      | 2.3 Ge et al. [2022]    |
| 4   | Cs(V <sub>0.93</sub> Nb <sub>0.07</sub> ) <sub>3</sub> Sb <sub>5</sub> | SD         | 4.45 Li et al. [2022]   |
| 5   | Zr <sub>4</sub> Rh <sub>2</sub> O                                      | Order 3.73 | Watanabe et al. [2023]  |
| 6   | Zr <sub>4</sub> Pd <sub>2</sub> O                                      | Order 2.73 | Watanabe et al. [2023]  |
| 7   | LaFeSiO <sub>0.9</sub>                                                 | PD         | 10 Hansen et al. [2022] |

152 features of the crystals. To control overfitting, a weight decay of 5e-3 is applied. The learning rate is  
 153 set to 5e-5, with a minimum learning rate of 1e-6. We employ the AdamW optimizer for efficient  
 154 optimization. The model architecture consisted of 6 Transformer blocks, each with 8 attention  
 155 heads. This allowed the model to effectively capture the relationships and dependencies within the  
 156 crystal structures. Irreps features consist of channels of vectors with degrees up to  $L_{max}$ . We denote  
 157  $C_L$  type- $L$  vectors as  $(C_L, L)$  and  $C_{(L,p)}$  type- $(L, p)$  vectors as  $(C_{(L,p)}, L, p)$ . Brackets denote  
 158 concatenations of vectors. we set irreps features containing 512 type-0 vectors and 128 type-1 vectors,  
 159 which can be expressed as  $[(512, 0), (128, 1)]$ .

160 Table 7 summarizes the hyper-parameters for the model.

Table 9: The predicted potential candidates of high- $T_c$  cuprate and h-riched superconductors. Candi-  
 dates of high confidence are marked in gray.

| Type     | ICSD code                       | Chemical formula                                        | O/SD/PD | $T_c$ (K) | Reported SC.                                               |
|----------|---------------------------------|---------------------------------------------------------|---------|-----------|------------------------------------------------------------|
| Cuprate  | 68675                           | CuO <sub>2</sub> Sr <sub>0.075</sub>                    | PD      | 93.42     | CuO <sub>2</sub> Sr<br>91K Takahashi et al. [1994]         |
|          | 50774                           | Ca <sub>0.779</sub> CuO <sub>2</sub> Y <sub>0.041</sub> | PD      | 65.70     |                                                            |
|          | 50773                           | Ca <sub>0.82</sub> CuO <sub>2</sub>                     | PD      | 64.72     | CaCuO <sub>2</sub><br>89K Schön et al. [2001]              |
|          | 68217                           | Ba <sub>2</sub> CuO <sub>3</sub>                        | O       | 59.89     | Ba <sub>2</sub> CuO <sub>3.2</sub><br>70K Li et al. [2019] |
|          | 67394                           | Ba <sub>2</sub> CuIO <sub>2</sub>                       | O       | 43.80     | -                                                          |
| H-riched | 187375                          | ErH <sub>3</sub>                                        | O       | 193.03    | -                                                          |
|          | 635802                          | GdH <sub>3</sub>                                        | O       | 143.19    | -                                                          |
|          | 623739                          | H <sub>2.57</sub> Co <sub>0.14</sub> U <sub>0.84</sub>  | PD      | 136.76    | -                                                          |
|          | 42009                           | TbH <sub>2.25</sub>                                     | SD      | 135.13    | -                                                          |
|          | 424154                          | H <sub>6</sub> Mg <sub>1.02</sub> Ti <sub>1.98</sub>    | O       | 134.34    | -                                                          |
|          | 230140                          | Li <sub>0.14</sub> Y <sub>0.86</sub> H <sub>2.7</sub>   | PD      | 125.94    | -                                                          |
| 93250    | YFe <sub>2</sub> H <sub>5</sub> | PD                                                      | 125.00  | -         |                                                            |

### 161 3.2 Generative models

162 We apply the codebases from CDVAE Xie et al. [2022]<sup>9</sup>, SyMat Luo et al. [2024]<sup>10</sup> and DiffCSP Jiao  
 163 et al. [2023]<sup>11</sup> for baseline implementations. All models are conducted experiments based data  
 164 splited method of 6:2:2. For pretraining, we obtain crystal structures from the databases of Materials  
 165 Project<sup>12</sup>, Open Quantum Materials Database<sup>13</sup>, Matgen<sup>14</sup>, and ICSD<sup>15</sup>. Molecular crystals are  
 166 excluded from the dataset. Subsequently, we perform deduplication on all crystal structures, resulting  
 167 in approximately 1.14 million unique structures. The training specifics for each model are outlined  
 168 below:

<sup>9</sup><https://github.com/txie-93/cdvae>

<sup>10</sup><https://github.com/dive1ab/AIRS>

<sup>11</sup><https://github.com/jiaor17/DiffCSP>

<sup>12</sup><https://next-gen.materialsproject.org>

<sup>13</sup><https://www.oqmd.org>

<sup>14</sup><https://matgen.nscg-gz.cn>

<sup>15</sup><https://icsd.products.fiz-karlsruhe.de/>

169 **3.2.1 CDVAE.**

170 For CDVAE model, We replaced the original DimNet++ Gasteiger et al. [2020] with SODNet to  
171 ensure a fair comparison with other generation models. Regarding the decoder, we utilize the  
172 GemNet-T Gasteiger et al. [2021], which consists of 3 layers and 128 hidden states.

173 **3.2.2 SyMat.**

174 For the SyMat model, the property predictor employs SphereNet, which consists of four message-  
175 passing layers with a hidden size of 128. The VAE decoder utilizes MLP models composed of  
176 two linear layers with a ReLU activation function between them and a hidden size of 256. During  
177 training, we use a learning rate of 0.001, a batch size of 128, and run for 1,000 epochs. We assign  
178 different weights to various loss terms: 1.0 for atom type set size, 30.0 for atom types, 1.0 for the  
179 number of each atom type, and 10.0 for lattice items. Additionally, we apply a weight of 0.01 for the  
180 KL-divergence loss and 10.0 for the denoising score matching loss.

181 **3.2.3 DiffCSP.**

182 We employ a configuration of 6 layers with 512 hidden states for datasets other than specified  
183 ones. The dimension of the Fourier embedding is set to 256. To control the variance of the DDPM  
184 (Diffusion-Driven Probabilistic Modeling) process on  $L_t$ , we utilize the cosine scheduler with 0.008.  
185 Additionally, we use an exponential scheduler with  $\sigma_1 = 0.005$ ,  $\sigma_T = 0.5$  to control the noise scale  
186 of the score matching process on  $F_t$ . The diffusion step is set to 1000. Our model is trained for 1000  
187 epochs, employing the same optimizer and learning rate scheduler as CDVAE.

188 **3.2.4 DiffCSP-SC.**

189 We utilize SODNet as the property predictor, and the parameter configuration aligns with Table 7.  
190 The parameters for the diffusion process also follow the original DiffCSP setup. The difference lies  
191 in the message passing layer, where we employ a transformer. Specifically, we use a 512-dimensional  
192 hidden state encoding and set the number of heads to 8.

193 **3.3 Pre-training dataset**

194 we pre-trained our model on approximately 1.14 million unique 3D crystals sourced from existing  
195 databases, including Project<sup>16</sup>, OQMD<sup>17</sup>, Matgen<sup>18</sup>, and ICSD<sup>19</sup>.

196 **4 Potential superconductors**

197 In this section, we initially validate our model using the  $T_c$  values of superconducting materials  
198 reported in recent literature, noting that these data points are not included in the SuperCon3D dataset.  
199 Subsequently, we present the potential superconducting materials using property prediction model  
200 based on SODNet and generative model based on DiffCSP-SC, respectively.

201 **4.1 Real-world superconductors validation**

202 As shown in Table 8, we have collected the structures of superconducting materials along with their  
203 corresponding  $T_c$  values, as reported in the latest literature over the past three years. This includes a  
204 total of seven superconducting materials with both ordered and disordered structures.

---

<sup>16</sup><https://next-gen.materialsproject.org>

<sup>17</sup><https://www.oqmd.org>

<sup>18</sup><https://matgen.nscg-gz.cn>

<sup>19</sup><https://icsd.products.fiz-karlsruhe.de>



Table 10: The predicted potential candidates of high- $T_c$  heavy-fermion, iron-based and others superconductors. Candidates of high confidence are marked in gray.

| Type          | ICSD code | Chemical formula                                                                                | O/SD/PD | $T_c$ (K) | Reported SC.                                                                                       |
|---------------|-----------|-------------------------------------------------------------------------------------------------|---------|-----------|----------------------------------------------------------------------------------------------------|
| Heavy-Fermion | 168466    | LaMg <sub>12</sub>                                                                              | O       | 23.83     | -                                                                                                  |
|               | 161141    | LaMg <sub>11.196</sub> Al <sub>0.804</sub>                                                      | SD      | 21.13     | -                                                                                                  |
|               | 69897     | C <sub>2</sub> Ce <sub>0.75</sub> U <sub>0.25</sub>                                             | PD      | 11.88     | -                                                                                                  |
|               | 647197    | Np <sub>1.1</sub> Pu <sub>0.9</sub>                                                             | SD      | 11.75     | -                                                                                                  |
|               | 614236    | TmFe <sub>4</sub> B                                                                             | O       | 10.81     | -                                                                                                  |
| Iron-based    | 427163    | Ba <sub>0.83</sub> Fe <sub>2</sub> Rb <sub>0.17</sub> As <sub>2</sub>                           | SD      | 23.21     | Ba <sub>0.6</sub> Fe <sub>2</sub> Rb <sub>0.4</sub> As <sub>2</sub><br>37.5K Peschke et al. [2014] |
|               | 188347    | BaFe <sub>2</sub> As <sub>2</sub>                                                               | O       | 23.27     | -                                                                                                  |
|               | 39530     | FeCl <sub>7</sub> Te                                                                            | O       | 19.57     | -                                                                                                  |
|               | 633401    | FeSb <sub>0.4</sub> Te <sub>1.6</sub>                                                           | SD      | 16.83     | -                                                                                                  |
|               | 165523    | As <sub>2</sub> Ba <sub>0.777</sub> Fe <sub>2</sub> -<br>K <sub>0.126</sub> Sn <sub>0.096</sub> | PD      | 15.55     | -                                                                                                  |
| Others        | 96031     | Ba <sub>1.1432</sub> Co <sub>0.1429</sub> -<br>O <sub>3.0009</sub> Rh <sub>0.8574</sub>         | PD      | 202.12    | -                                                                                                  |
|               | 58639     | Ba <sub>0.515</sub> Ca <sub>0.485</sub>                                                         | SD      | 160.95    | -                                                                                                  |
|               | 616160    | BaSr                                                                                            | SD      | 123.51    | -                                                                                                  |
|               | 106111    | SrTi <sub>2</sub>                                                                               | O       | 63.52     | -                                                                                                  |
|               | 428028    | Ge <sub>0.6</sub> Sb <sub>0.27</sub> Te                                                         | SD      | 47.48     | -                                                                                                  |

## 205 4.2 Screening based method

206 We apply our superconductivity predicting model for screening the entire ICSD database. Potential  
 207 superconductors are show in Table 9 and 10. To elaborate on the candidates with high confidence,  
 208 we provide the subsequent details:

- 209 1. CuO<sub>2</sub>Sr<sub>0.075</sub> and Ca<sub>0.82</sub>CuO<sub>2</sub> exhibit disordered structures, and their respective parent  
 210 compounds demonstrate superconductivity Takahashi et al. [1994], Schön et al. [2001].  
 211 Consequently, these disordered structures are more likely to be superconducting materials  
 212 as well.
- 213 2. Ba<sub>2</sub>CuO<sub>3.2</sub> exhibits superconductivity with a T<sub>c</sub> of 70K Li et al. [2019]. Its corresponding  
 214 parent structure Ba<sub>2</sub>CuO<sub>3</sub> may also be a superconductor, albeit with a comparatively lower  
 215 probability.
- 216 3. Ba<sub>0.83</sub>Fe<sub>2</sub>Rb<sub>0.17</sub>As<sub>2</sub> and Ba<sub>0.6</sub>Fe<sub>2</sub>Rb<sub>0.4</sub>As<sub>2</sub> share the same parent structure and have closely  
 217 related compositions. Given that Ba<sub>0.6</sub>Fe<sub>2</sub>Rb<sub>0.4</sub>As<sub>2</sub> exhibits superconductivity with a  
 218 T<sub>c</sub> of 37.5K Peschke et al. [2014], it is highly likely that Ba<sub>0.83</sub>Fe<sub>2</sub>Rb<sub>0.17</sub>As<sub>2</sub> is also a  
 219 superconducting material.

## 220 4.3 Interpretability on SODNet

221 We attempt to interpret our SODNet predictor by determining which feature(s) a given model weighs  
 222 most heavily when making the prediction. As shown in Fig. 5, we extract the node embedding of the  
 223 whole graph in the last layer of SODNet, and present the contributions of each atom to T<sub>c</sub> values. We  
 224 can observe that the B sites contributes more significantly to the property of T<sub>c</sub> compared to the Mg  
 225 site in Fig. 5 (a-d). Moreover, conducting atomic doping and atomic translation on the cation Mg  
 226 results in a decrease in T<sub>c</sub> with 39.0 K → 38.4 K → 34.3 K. This phenomenon demonstrates that  
 227 attempting to enhance the T<sub>c</sub> value by disrupting the symmetry of Mg site within the lattice may  
 228 be not workable. Another case of cuprate superconductor has shown in Fig. 5 (e-f), there are three  
 229 types of oxygen sites that contribute significantly to the T<sub>c</sub> value: Hg-O-Hg (PD disorder), Cu-O-Cu  
 230 (order), and Hg-O-Ba (order). Among them, the contribution of disordered Hg-O-Hg is the greatest,  
 231 indicating that disrupting the symmetry of oxygen atoms within the lattice might potentially further  
 232 enhance the property of T<sub>c</sub>.

Table 11: The novel high- $T_c$  cuprate and h-riched superconducting candidates. Candidates of high confidence are marked in gray.

| Type     | Index | Chemical formula                                                                | $T_c$ (K) | Reported SC.                                                   |
|----------|-------|---------------------------------------------------------------------------------|-----------|----------------------------------------------------------------|
| Cuprate  | 1     | Ba <sub>2</sub> CuCl <sub>2</sub> O <sub>2</sub>                                | 33.56     | -                                                              |
|          | 2     | Tl <sub>2</sub> Ca <sub>2</sub> Ba <sub>2</sub> Cu <sub>3</sub> O <sub>10</sub> | 14.09     | -                                                              |
|          | 3     | Ba <sub>3</sub> CaLa <sub>2</sub> GdCu <sub>7</sub> O <sub>17</sub>             | 10.12     | -                                                              |
|          | 4     | YCu <sub>3</sub> O <sub>7</sub>                                                 | 9.73      | -                                                              |
|          | 5     | BaCaCu <sub>3</sub> O <sub>7</sub>                                              | 9.65      | -                                                              |
|          | 6     | Cu <sub>7</sub> BO <sub>16</sub>                                                | 7.87      | -                                                              |
|          | 7     | CsMgCu <sub>3</sub> BiAuO <sub>8</sub>                                          | 7.82      | -                                                              |
| H-riched | 8     | TbH <sub>3</sub>                                                                | 164.33    | TbH <sub>3</sub><br>20K Hai et al. [2021]<br>Calculated by DFT |
|          | 9     | SeH <sub>3</sub>                                                                | 139.89    | 113K Novakovic et al. [2023]<br>Predicted by ML                |
|          | 10    | CaGe <sub>2</sub> H <sub>9</sub>                                                | 103.55    | -                                                              |
|          | 11    | Ca <sub>2</sub> MnCrH <sub>6</sub>                                              | 58.07     | -                                                              |
|          | 12    | SbH <sub>3</sub>                                                                | 46.42     | SbH <sub>3</sub><br>20K Fu et al. [2016]<br>Calculated by DFT  |
|          | 13    | MgCoCuH <sub>42</sub> CS <sub>2</sub> N <sub>16</sub>                           | 44.27     | -                                                              |
|          | 14    | Rb <sub>2</sub> Ca <sub>2</sub> H <sub>4</sub>                                  | 13.05     | -                                                              |

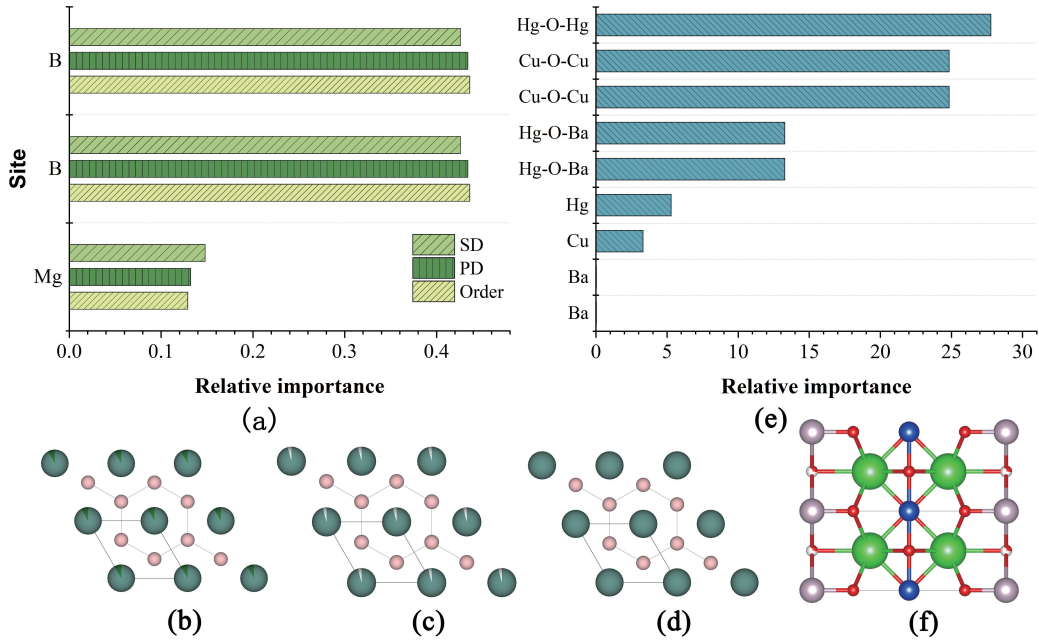

Figure 5: Contribution of each atom to  $T_c$  value. (a). Feature relative importance of each site in three type MgB<sub>2</sub> superconductors. Snapshots of (b) SD Mg<sub>0.9</sub>Al<sub>0.1</sub>B<sub>2</sub>, (c) PD Mg<sub>0.98</sub>B<sub>2</sub>, and (d) ordered MgB<sub>2</sub> crystals. Here, B Mg and Al sites are colored by light pink, atrovirens and dark atrovirens. (e). Feature relative importance of Ba<sub>2</sub>CuHgO<sub>4.27</sub> superconductor. (f). Snapshot of Ba<sub>2</sub>CuHgO<sub>4.27</sub> superconductor (Ba: green, Cu: blue, Hg: pink, O: red).

#### 233 4.4 Generative superconducting candidates

234 We apply our generative model for generating new superconducting candidates. We present the crystal  
 235 structures of the 20 superconducting candidate materials from Table 6 in Fig. 6. Additionally, we  
 236 display the 32 superconducting candidate materials in Table 11 and 12, arranged in descending order  
 237 of predicted  $T_c$  values. The structures of all superconducting candidate materials can be obtained  
 238 in the source code package. We collected superconducting materials that have been reported and  
 239 observed that five candidates are more likely to be superconducting materials. Among them, four candi-  
 240 dates obtained  $T_c$  through theoretical calculations, and another material displayed superconducting  
 241 properties through doping. Specific descriptions are as follows:

- 242 1.  $\text{SeH}_3$  exhibited a  $T_c$  of 113K as predicted by machine learning Novakovic et al. [2023],  
 243 corroborated by DFT calculations indicating 110K Zhang et al. [2015].
- 244 2. DFT methods calculated the  $T_c$  of  $\text{TbH}_3$ ,  $\text{SbH}_3$ , and  $\text{KFe}_2\text{As}_2$  as 20K Hai et al. [2021],  
 245 Fu et al. [2016], Ptok et al. [2020]. Since H-riched materials belong to conventional super-  
 246 conductors and show high  $T_c$  under high pressure, but the conditions for wet experimental  
 247 synthesis are very stringent. Therefore, it can further verify whether superconducting materi-  
 248 als are superconducting materials by combining DFT methods, and reduce the research  
 249 and development cycle of superconducting materials.
- 250 3. The parent compound  $\text{SmFeAsO}$  underwent a superconducting  $T_c$  around 54 K Azam et al.  
 251 [2023], following fluorine (F) doping at the O-site in the SmO layer. This case can provide us  
 252 with a method that we can use DiffCSP-SC’s generative model to generate superconducting  
 253 parent structures, and then improve the  $T_c$  of materials by doping, or transform materials  
 254 without superconducting properties into superconducting materials.

Table 12: The novel high- $T_c$  heavy-fermion, iron-based and others superconducting candidates. Candidates of high confidence are marked in gray.

| Type          | Index  | Chemical formula           | $T_c$ (K)              | Reported SC.                                                                     |
|---------------|--------|----------------------------|------------------------|----------------------------------------------------------------------------------|
| Heavy-Fermion | 15     | Th                         | 43.61                  | -                                                                                |
|               | 16     | $\text{Ba}_3\text{Pu}$     | 44.81                  | -                                                                                |
|               | 17     | $\text{ThC}_3$             | 17.96                  | -                                                                                |
|               | 18     | Lu                         | 4.86                   | -                                                                                |
|               | 19     | $\text{Yb}_3\text{In}$     | 1.04                   | -                                                                                |
| Iron-based    | 20     | $\text{BaFe}_2\text{Se}_2$ | 11.99                  | -                                                                                |
|               | 21     | $\text{SmFeAsO}$           | 4.42                   | $\text{SmFeAsO}_{0.8}\text{F}_{0.2}$<br>54K Azam et al. [2023]                   |
|               | 22     | $\text{KFe}_2\text{As}_2$  | 4.23                   | $\text{KFe}_2\text{As}_2$ @ 30GPa<br>20K Ptok et al. [2020]<br>Calculated by DFT |
|               | 23     | $\text{NdFeAsF}$           | 4.13                   | -                                                                                |
|               | 24     | $\text{FeSe}$              | 3.36                   | -                                                                                |
|               | Others | 25                         | $\text{Ba}_3\text{Ca}$ | 80.04                                                                            |
| 26            |        | $\text{Ba}_2\text{Se}$     | 60.70                  | -                                                                                |
| 27            |        | Ba                         | 52.26                  | -                                                                                |
| 28            |        | $\text{Mg}_3\text{B}$      | 43.96                  | -                                                                                |
| 29            |        | $\text{BaCl}_2\text{O}$    | 35.72                  | -                                                                                |
| 30            |        | $\text{Ba}_2\text{CaB}$    | 32.77                  | -                                                                                |
| 31            |        | $\text{Sb}_2\text{Ba}_4$   | 22.70                  | -                                                                                |
| 32            |        | $\text{V}_3\text{Si}_{11}$ | 16.28                  | -                                                                                |

#### 255 4.5 DFT calculations

256 We conduct DFT calculation using the Vienna ab initio package (VASP) Wang and Pickett [1983],  
 257 Chan and Ceder [2010]. The structures are fully relaxed using the generalized gradient approximation  
 258 (GGA) Perdew et al. [1996] of the SCAN meta-GGA functional, employing the pseudopotentials  
 259 of the projector augmented wave (PAW) method Blöchl [1994]. A plane wave cutoff of 500 eV  
 260 is employed for all simulations. Brillouin-zone integrations are performed using the  $\tau$ -centered  
 261 Monkhorst-Pack (MP) scheme Monkhorst and Pack [1976]. We initiate the calculations with a

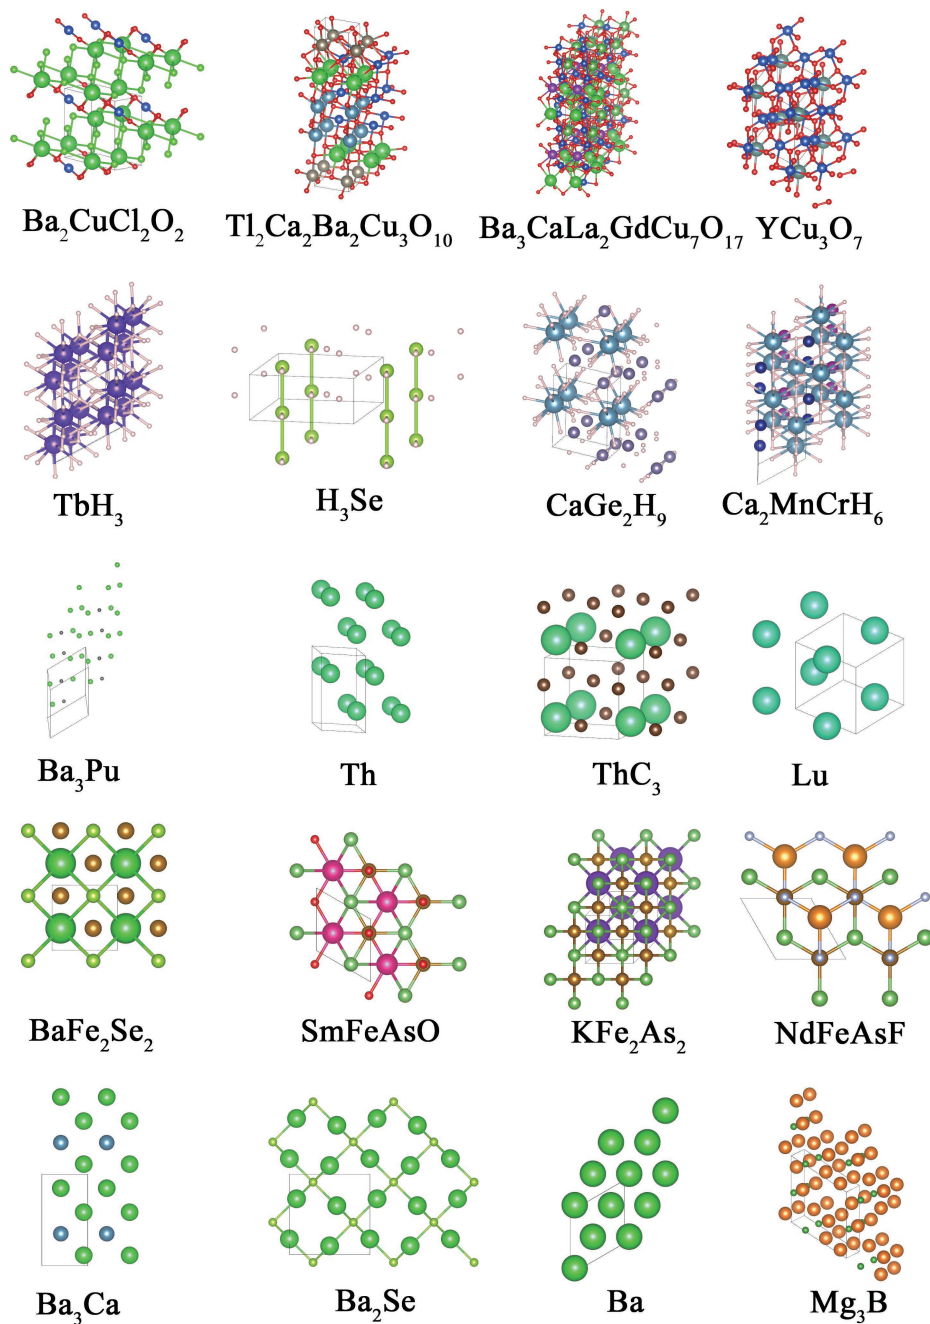

Figure 6: The geometric structures of novel superconducting candidates in Table 6.

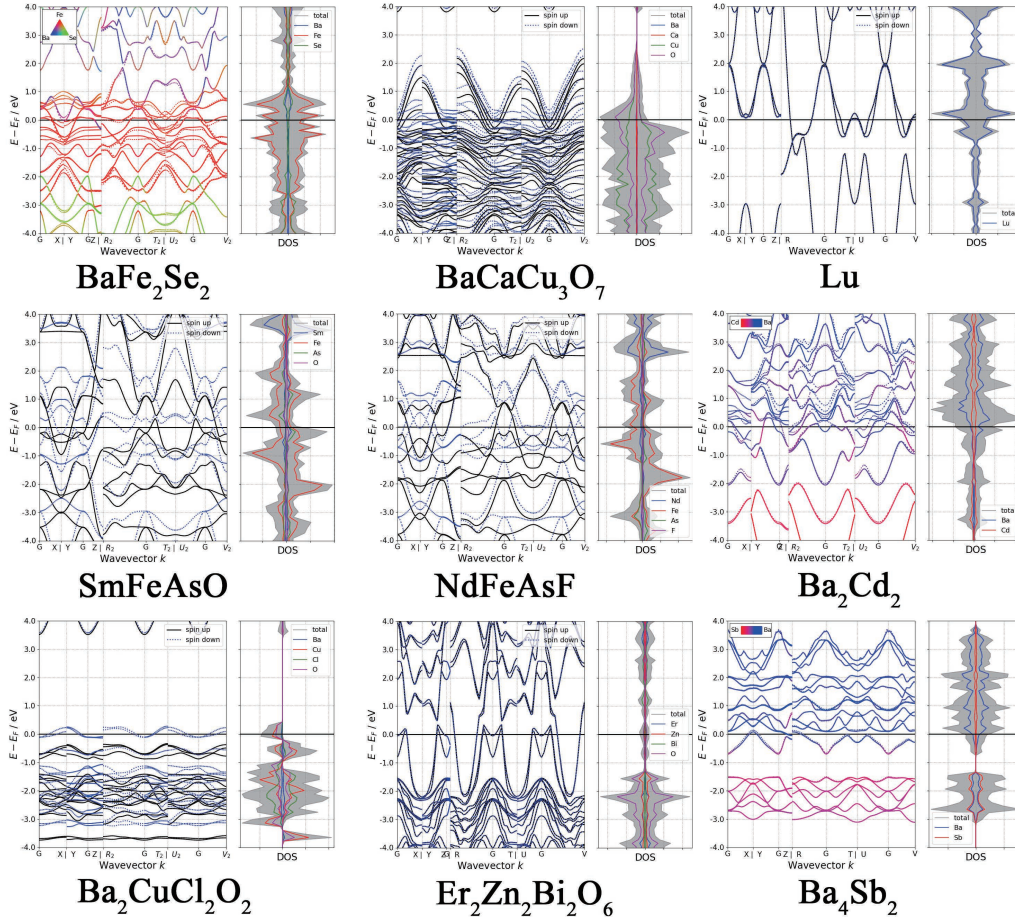

Figure 7: The electronic structures of novel superconducting candidates.

262 k-point mesh featuring a dense sampling density of  $2\pi \times 0.04$ . The convergence criteria for energy  
 263 and force is set to 0.1 meV and 0.001 eV/Å, respectively.

264 The van Hove singularity (VHS) is a notable occurrence in condensed matter physics, specifically  
 265 in the density of states (DOS) of a material. It manifests as a distinct peak or divergence in the  
 266 DOS at a particular energy level. We select materials from Table 11 and 12 for DFT calculations  
 267 and display their band structures and density of states (DOS) in Fig. 7. From the density of states  
 268 (DOS) plot, we can observe the van Hove singularity (VHS) phenomenon. Additionally, we can  
 269 also observe the presence of flat bands in the band structures of materials such as  $\text{Ba}_2\text{CuCl}_2\text{O}_2$ , Lu,  
 270  $\text{Ba}_4\text{Sb}_2$ , and others. The integration of flat bands in the electronic architecture, along with the Van  
 271 Hove Singularities (VHS) in the Density of States (DOS), markedly amplifies the likelihood of these  
 272 candidates being superconducting materials.

## 273 5 Pipeline for designing real-world superconductors.

274 Fig. 8 presents a pipeline for designing SC., validating our dataset and models for real-world scenarios.  
 275 We initially generate potential, ordered superconducting structures using the DiffCSP-SC model  
 276 trained on the SuperCon3D database. Candidate materials are selected based on  $T_c$  values predicted  
 277 by SODNet, followed by DFT verification to confirm the presence of superconducting electronic  
 278 structures, such as VHS. Subsequently, selected candidates undergo wet lab synthesis, with  $T_c$   
 279 values characterized and recorded in the SuperCon3D database. Further, if a superconductor is

280 discovered, methods such as doping, which may transform ordered structures into disordered ones,  
 281 are explored to enhance the  $T_c$  value. SODNet is employed to investigate the relationship between  
 282 disordered structures and doping ratios, aiming to design optimal doping proportions for experimental  
 283 verification. These experimental outcomes are also recorded in the database. Continuous expansion  
 284 of the database will incrementally improve the accuracy of the DiffCSP-SC and SODNet models  
 285 trained on this dataset, creating a reinforcing cycle of enhancement.

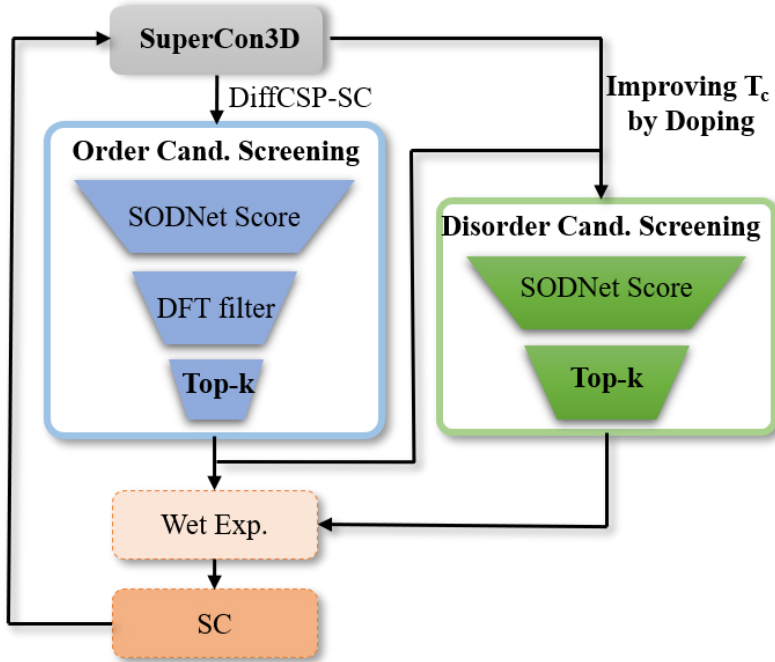

Figure 8: Flowchart for designing novel SC materials.

## 286 6 Limitations

287 Our SuperCon3D dataset, featuring experimental structures and  $T_c$  values, paves the way for  
 288 real-world superconductor applications. Combined with SODNet, which addresses disordered graph  
 289 issues previously overlooked by the AI community, and DiffCSP-SC for novel designs. However,  
 290 the accuracy of data-driven models remains constrained by the collected superconducting dataset.  
 291 As Figure 4 in the Appendix shows, data unevenness and elemental skewness (especially in Cu  
 292 and O) may bias the model. Additionally, as Table 8 indicates, atomic distributions under extreme  
 293 pressures contribute to predictive errors. Addressing these, Figure 8 presents our pipeline, combining  
 294 DiffCSP-SC and SODNet, to design and validate novel superconductors through wet experiments,  
 295 iteratively enriching the dataset for improved model training and accuracy.

## 296 7 Code

297 We have provided the source code of SODNet and DiffCSP-SC, which are mentioned  
 298 in this article, on an anonymous GitHub repository. The access address is as follows:  
 299 <https://anonymous.4open.science/r/SODNet-F569>, <https://anonymous.4open.science/r/DiffCSP-SC-8F3F>.  
 300

## 301 References

- 302 Maurice Weiler, Mario Geiger, Max Welling, Wouter Boomsma, and Taco Cohen. 3d steerable  
303 cnns: Learning rotationally equivariant features in volumetric data. In Samy Bengio, Hanna M.  
304 Wallach, Hugo Larochelle, Kristen Grauman, Nicolò Cesa-Bianchi, and Roman Garnett, edi-  
305 tors, *Advances in Neural Information Processing Systems 31: Annual Conference on Neural*  
306 *Information Processing Systems 2018, NeurIPS 2018, December 3-8, 2018, Montréal, Canada*,  
307 pages 10402–10413, 2018. URL [https://proceedings.neurips.cc/paper/2018/hash/](https://proceedings.neurips.cc/paper/2018/hash/488e4104520c6aab692863cc1dba45af-Abstract.html)  
308 [488e4104520c6aab692863cc1dba45af-Abstract.html](https://proceedings.neurips.cc/paper/2018/hash/488e4104520c6aab692863cc1dba45af-Abstract.html).
- 309 Stefan Elfving, Eiji Uchibe, and Kenji Doya. Sigmoid-weighted linear units for neural network func-  
310 tion approximation in reinforcement learning. *Neural Networks*, 107:3–11, 2018. ISSN 0893-6080.  
311 doi: <https://doi.org/10.1016/j.neunet.2017.12.012>. URL [https://www.sciencedirect.com/](https://www.sciencedirect.com/science/article/pii/S0893608017302976)  
312 [science/article/pii/S0893608017302976](https://www.sciencedirect.com/science/article/pii/S0893608017302976). Special issue on deep reinforcement learning.
- 313 Jonathan Ho, Ajay Jain, and Pieter Abbeel. Denoising diffusion probabilistic models. *Advances in*  
314 *Neural Information Processing Systems*, 33:6840–6851, 2020.
- 315 Ashish Vaswani, Noam Shazeer, Niki Parmar, Jakob Uszkoreit, Llion Jones, Aidan N Gomez, Łukasz  
316 Kaiser, and Illia Polosukhin. Attention is all you need. *Advances in neural information processing*  
317 *systems*, 30, 2017.
- 318 Victor Garcia Satorras, Emiel Hooeboom, and Max Welling. E (n) equivariant graph neural networks.  
319 In *International Conference on Machine Learning*, pages 9323–9332. PMLR, 2021.
- 320 Rui Jiao, Wenbing Huang, Peijia Lin, Jiaqi Han, Pin Chen, Yutong Lu, and Yang Liu. Crystal structure  
321 prediction by joint equivariant diffusion on lattices and fractional coordinates. In *Workshop on*  
322 *“Machine Learning for Materials” ICLR 2023*, 2023. URL [https://openreview.net/forum?](https://openreview.net/forum?id=VPByphdu24j)  
323 [id=VPByphdu24j](https://openreview.net/forum?id=VPByphdu24j).
- 324 Kristof T Schütt, Huziel E Sauceda, P-J Kindermans, Alexandre Tkatchenko, and K-R Müller.  
325 SchNet—a deep learning architecture for molecules and materials. *The Journal of Chemical Physics*,  
326 148(24):241722, 2018.
- 327 Tian Xie and Jeffrey C. Grossman. Crystal graph convolutional neural networks for an accurate  
328 and interpretable prediction of material properties. *Physical Review Letters*, 120(14):145301,  
329 2018. doi: 10.1103/PhysRevLett.120.145301. URL [https://link.aps.org/doi/10.1103/](https://link.aps.org/doi/10.1103/PhysRevLett.120.145301)  
330 [PhysRevLett.120.145301](https://link.aps.org/doi/10.1103/PhysRevLett.120.145301).
- 331 Johannes Gasteiger, Shankari Giri, Johannes T. Margraf, and Stephan Günnemann. Fast and  
332 uncertainty-aware directional message passing for non-equilibrium molecules. In *Machine Learn-*  
333 *ing for Molecules Workshop, NeurIPS*, 2020.
- 334 Yi Liu, Limei Wang, Meng Liu, Yuchao Lin, Xuan Zhang, Bora Oztekin, and Shuiwang Ji. Spherical  
335 message passing for 3d molecular graphs. In *International Conference on Learning Representations*  
336 *(ICLR)*, 2022.
- 337 Kamal Choudhary and Brian DeCost. Atomistic line graph neural network for improved materials  
338 property predictions. *npj Computational Materials*, 7(1):1–8, 2021.
- 339 Keqiang Yan, Yi Liu, Yu-Ching Lin, and Shuiwang Ji. Periodic graph transformers for crystal material  
340 property prediction. *ArXiv*, abs/2209.11807, 2022.
- 341 Chi Chen, Weike Ye, Yunxing Zuo, Chen Zheng, and Shyue Ping Ong. Graph networks as a  
342 universal machine learning framework for molecules and crystals. *Chemistry of Materials*, 31  
343 (9):3564–3572, 2019. ISSN 0897-4756. doi: 10.1021/acs.chemmater.9b01294. URL [https://](https://doi.org/10.1021/acs.chemmater.9b01294)  
344 [doi.org/10.1021/acs.chemmater.9b01294](https://doi.org/10.1021/acs.chemmater.9b01294).

- 345 Liang Ma, Kui Wang, Yu Xie, Xin Yang, Yingying Wang, Mi Zhou, Hanyu Liu, Xiaohui Yu,  
346 Yongsheng Zhao, Hongbo Wang, et al. High-temperature superconducting phase in clathrate  
347 calcium hydride  $\text{CaH}_6$  up to 215 K at a pressure of 172 GPa. *Physical Review Letters*, 128(16):  
348 167001, 2022.
- 349 Changling Zhang, Xin He, Chang Liu, Zhiwen Li, Ke Lu, Sijia Zhang, Shaomin Feng, Xiancheng  
350 Wang, Yi Peng, Youwen Long, et al. Record high  $T_c$  element superconductivity achieved in  
351 titanium. *Nature Communications*, 13(1):5411, 2022.
- 352 Jun Ge, Pinyuan Wang, Ying Xing, Qiangwei Yin, Hechang Lei, Ziqiang Wang, and Jian Wang.  
353 Discovery of charge-4e and charge-6e superconductivity in kagome superconductor  $\text{CsV}_3\text{Sb}_5$ . *arXiv*  
354 *preprint arXiv:2201.10352*, 2022.
- 355 Yongkai Li, Qing Li, Xinwei Fan, Jinjin Liu, Qi Feng, Min Liu, Chunlei Wang, Jia-Xin Yin, Junxi  
356 Duan, Xiang Li, et al. Tuning the competition between superconductivity and charge order in the  
357 kagome superconductor  $\text{CsV}_3\text{Sb}_5$ . *Physical Review B*, 105(18):L180507, 2022.
- 358 Yuto Watanabe, Akira Miura, Chikako Moriyoshi, Aichi Yamashita, and Yoshikazu Mizuguchi.  
359 Observation of superconductivity and enhanced upper critical field of  $\eta$ -carbide-type oxide  $\text{ZrPd}_2\text{O}$ .  
360 *Scientific Reports*, 13(1):22458, 2023.
- 361 Mad F Hansen, J-B Vaney, Christophe Lepoittevin, F Bernardini, Etienne Gaudin, V Nassif, M-A  
362 Méasson, A Sulpice, H Mayaffre, M-H Julien, et al. Superconductivity in the crystallogenic  
363  $\text{LaFeSiO}_{1-\delta}$  with squeezed  $\text{FeSi}$  layers. *npj Quantum Materials*, 7(1):1–8, 2022.
- 364 H Takahashi, N Mōri, M Azuma, Z Hiroi, and M Takano. Effect of pressure on  $T_c$  of hole- and  
365 electron-doped infinite-layer compounds up to 8 GPa. *Physica C: Superconductivity*, 227(3-4):  
366 395–398, 1994.
- 367 JH Schön, M Dorget, FC Beuran, XZ Zu, E Arushanov, C Deville Cavellin, and M Lagues. Super-  
368 conductivity in  $\text{CaCuO}_2$  as a result of field-effect doping. *Nature*, 414(6862):434–436, 2001.
- 369 WM Li, JF Zhao, LP Cao, Z Hu, QZ Huang, XC Wang, Y Liu, GQ Zhao, J Zhang, QQ Liu, et al.  
370 Superconductivity in a unique type of copper oxide. *Proceedings of the National Academy of*  
371 *Sciences*, 116(25):12156–12160, 2019.
- 372 Tian Xie, Xiang Fu, Octavian-Eugen Ganea, Regina Barzilay, and Tommi S. Jaakkola. Crystal  
373 diffusion variational autoencoder for periodic material generation. In *The Tenth International*  
374 *Conference on Learning Representations, ICLR 2022, Virtual Event, April 25-29, 2022*. OpenRe-  
375 view.net, 2022. URL [https://openreview.net/forum?id=03RLpj-tc\\_](https://openreview.net/forum?id=03RLpj-tc_).
- 376 Youzhi Luo, Chengkai Liu, and Shuiwang Ji. Towards symmetry-aware generation of periodic  
377 materials. *Advances in Neural Information Processing Systems*, 36, 2024.
- 378 Johannes Gasteiger, Florian Becker, and Stephan Günnemann. Gemnet: Universal directional  
379 graph neural networks for molecules. In *Conference on Neural Information Processing Systems*  
380 *(NeurIPS)*, 2021.
- 381 Simon Peschke, Tobias Stürzer, and Dirk Johrendt.  $\text{Ba}_{1-x}\text{Rb}_x\text{Fe}_2\text{As}_2$  and generic phase behavior of  
382 hole-doped 122-type superconductors. *Zeitschrift für anorganische und allgemeine Chemie*, 640  
383 (5):830–835, 2014.
- 384 Yu-Long Hai, Ning Lu, Hui-Li Tian, Meng-Jing Jiang, Wei Yang, Wen-Jie Li, Xun-Wang Yan,  
385 Chao Zhang, Xiao-Jia Chen, and Guo-Hua Zhong. Cage structure and near room-temperature  
386 superconductivity in  $\text{ThH}_n$  ( $n=1-12$ ). *The Journal of Physical Chemistry C*, 125(6):3640–3649,  
387 2021.
- 388 Lazar Novakovic, Ashkan Salamat, and Keith V Lawler. Machine learning using structural repre-  
389 sentations for discovery of high temperature superconductors. *arXiv preprint arXiv:2301.10474*,  
390 2023.



- 391 Yuhao Fu, Xiangpo Du, Lijun Zhang, Feng Peng, Miao Zhang, Chris J Pickard, Richard J Needs,  
392 David J Singh, Weitao Zheng, and Yanming Ma. High-pressure phase stability and superconductivity  
393 of pnictogen hydrides and chemical trends for compressed hydrides. *Chemistry of Materials*,  
394 28(6):1746–1755, 2016.
- 395 Shoutao Zhang, Yanchao Wang, Jurong Zhang, Hanyu Liu, Xin Zhong, Hai-Feng Song, Guochun  
396 Yang, Lijun Zhang, and Yanming Ma. Phase diagram and high-temperature superconductivity of  
397 compressed selenium hydrides. *Scientific reports*, 5(1):15433, 2015.
- 398 Andrzej Ptok, Konrad Jerzy Kapcia, Małgorzata Sternik, and Przemysław Piekarczyk. Superconductivity  
399 of  $\text{KFe}_2\text{As}_2$  under pressure: Ab initio study of tetragonal and collapsed tetragonal phases. *Journal*  
400 *of Superconductivity and Novel Magnetism*, 33(8):2347–2354, 2020.
- 401 Mohammad Azam, Manasa Manasa, Tatiana Zajarniuk, Ryszard Diduszko, Tomasz Cetner, Andrzej  
402 Morawski, Andrzej Wiśniewski, and Shiv J Singh. Antimony doping effect on the superconducting  
403 properties of  $\text{SmFeAs}$  (o, f). *IEEE Transactions on Applied Superconductivity*, 2023.
- 404 CS Wang and WE Pickett. Density-functional theory of excitation spectra of semiconductors:  
405 application to Si. *Physical review letters*, 51(7):597, 1983.
- 406 MKY Chan and Gerbrand Ceder. Efficient band gap prediction for solids. *Physical review letters*,  
407 105(19):196403, 2010.
- 408 John P Perdew, Kieron Burke, and Matthias Ernzerhof. Generalized gradient approximation made  
409 simple. *Physical review letters*, 77(18):3865, 1996.
- 410 Peter E Blöchl. Projector augmented-wave method. *Physical review B*, 50(24):17953, 1994.
- 411 Hendrik J Monkhorst and James D Pack. Special points for Brillouin-zone integrations. *Physical*  
412 *review B*, 13(12):5188, 1976.
